# Supplementary material for: Mesoporous (Ta, Nb)3W7 Modified with Stearic Acid Used as Solid Acids for Esterification
Source: Hindawi journal article supplement (doi:10.1155/2017/9136528), 2017-01-01
Supplement: f1 [file 9136528.f1.pdf]

### Support information:

As can be seen from XRD, the fresh and reclaimed mesoporous Ta<sub>3</sub>W<sub>7</sub> oxide (stearic acid) was no significant change in the surface species, only the crystal size of the regenerated catalyst became larger.

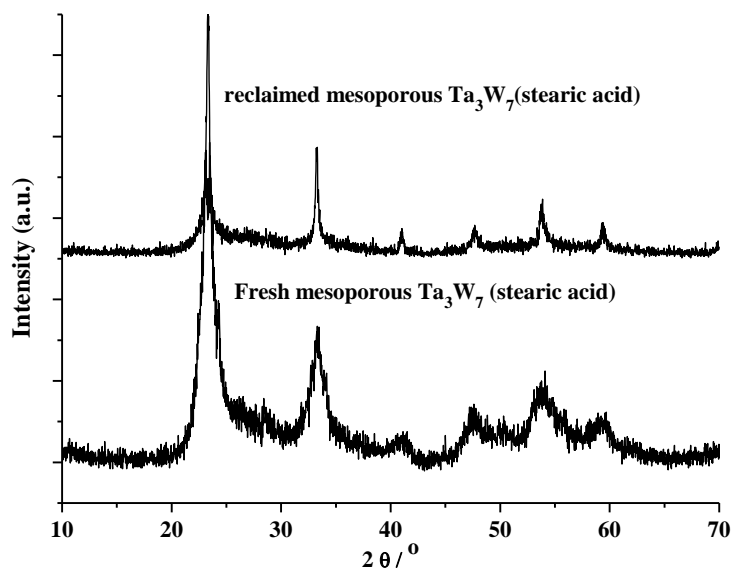

**Fig.S1.** Wide-angle diffraction patterns of fresh mesoporous Ta<sub>3</sub>W<sub>7</sub> oxide(stearic acid) and reclaimed mesoporous Ta<sub>3</sub>W<sub>7</sub> oxide(stearic acid)

The results of XPS are shown in Fig.S2. It can be seen that the O1s, W4f and Ta4f binding energies of the the fresh and reclaimed mesoporous Ta<sub>3</sub>W<sub>7</sub> oxide (stearic acid) are similar, and there is no obvious change.

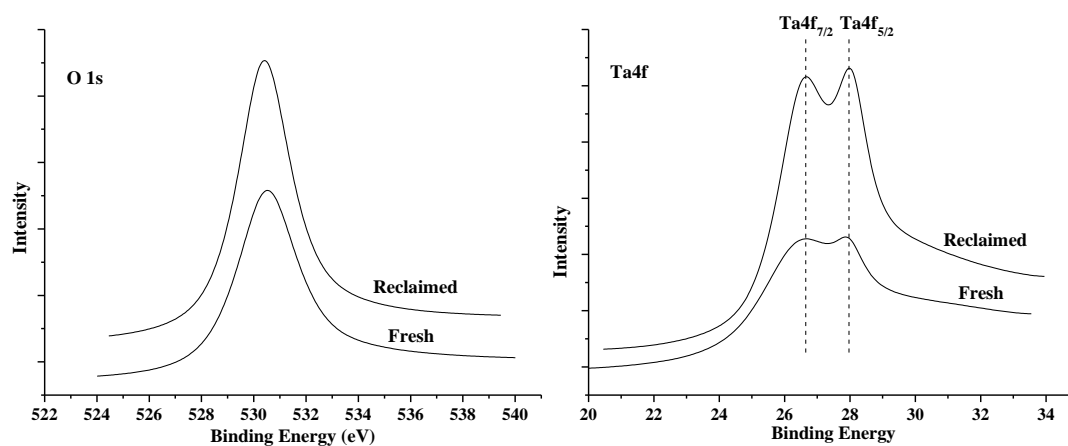

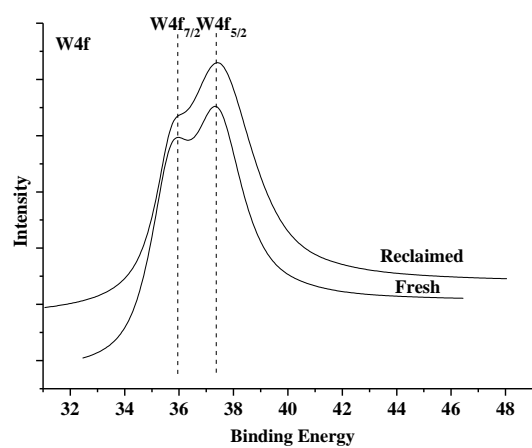

**Fig.S2.** O1s, Ta4f, and W4f XPS of Fresh mesoporous  $\text{Ta}_3\text{W}_7$  oxide(stearic acid) and reclaimed mesoporous  $\text{Ta}_3\text{W}_7$  oxide(stearic acid, 5 times)
